# Supplementary material for: Dipole controlled Schottky barrier in the blue-phosphorene-phase of GeSe based van der Waals heterostructures
Source: Royal Society of Chemistry journal article supplement (doi:10.1039/c8nh00413g), 2018-11-16
Supplement: c8nh00413g1.pdf [file c8nh00413g1.pdf]

## Supporting Information

### **Dipole controlled Schottky barrier in blue phosphorene-phosphorene-phase of GeSe based van der Waals heterostructures**

Lei Peng,<sup>a</sup> Yu Cui,<sup>a</sup> Liping Sun,<sup>a</sup> Jinyan Du,<sup>a</sup> Sufan Wang,<sup>a</sup> Shengli Zhang,<sup>\*,b</sup>

Yucheng Huang<sup>\*,a</sup>

<sup>a</sup> College of Chemistry and Material Science, The Key Laboratory of Functional Molecular Solids, Ministry of Education, Anhui Laboratory of Molecule-Based Materials, Anhui Normal University, Wuhu 241000, China

<sup>b</sup> Key Laboratory of Advanced Display Materials and Devices, Ministry of Industry and Information Technology, College of Material Science and Engineering, Nanjing University of Science and Technology, Nanjing 210094, China

E-mail: [huangyc@mail.ahnu.edu.cn](mailto:huangyc@mail.ahnu.edu.cn); [zhangslvip@njust.edu.cn](mailto:zhangslvip@njust.edu.cn).

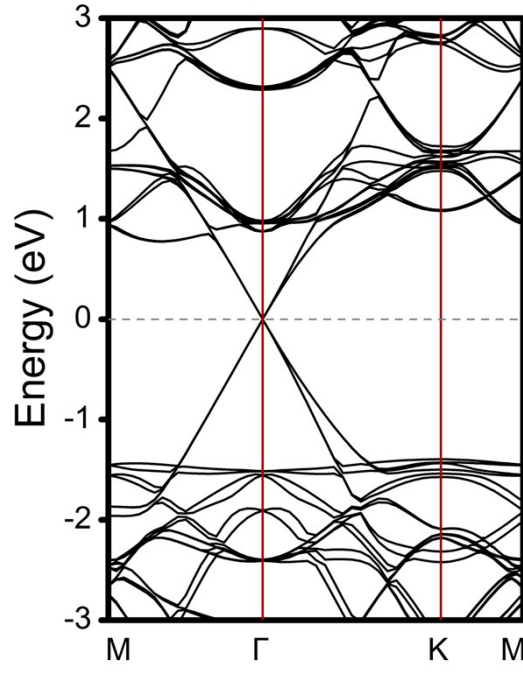

**Figure. S1.** Electronic band structure of MX-G with SOC effects.

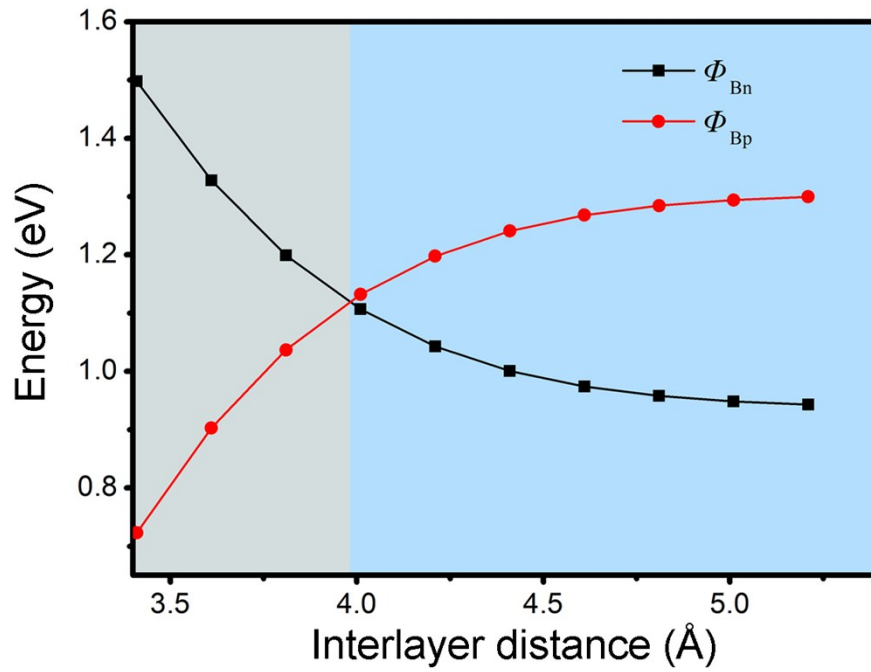

**Figure. S2.** The SBHs in XM-G as a function of the interlayer distance.

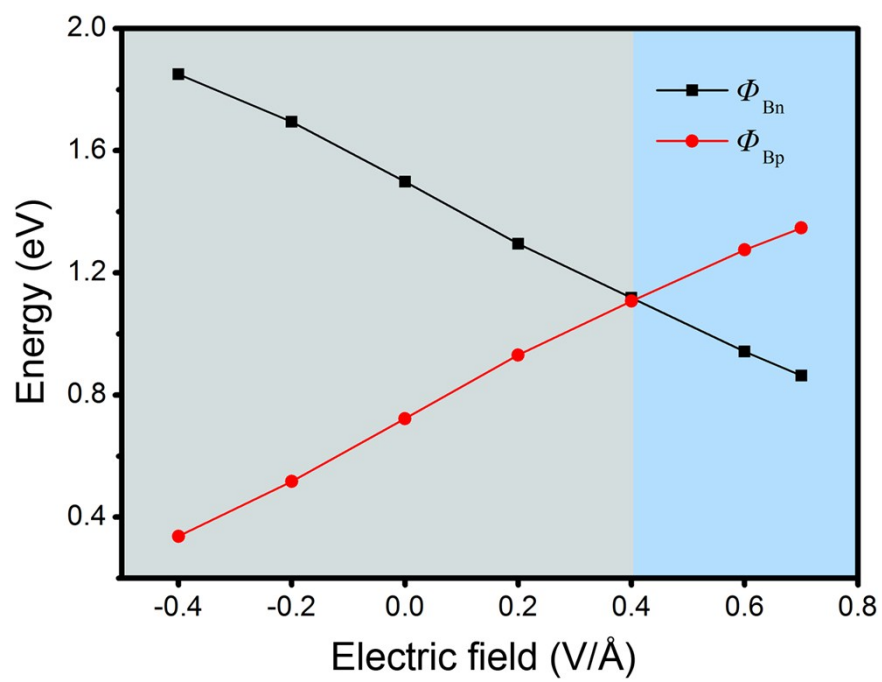

**Figure. S3.** The SBHs in XM-G as a function of the electric field.
